# Supplementary material for: Detection of microsatellite instability with Idylla MSI assay in colorectal and endometrial cancer
Source: PubMed Central journal article supplement (PMC8448708; doi:10.1007/s00428-021-03082-w), 2021-03-23
Supplement: 428_2021_3082_MOESM1_ESM.pdf [file 428_2021_3082_MOESM1_ESM.pdf]

**Virchows Archiv**

**Supplementary Information**

for

**Detection of microsatellite instability with Idylla MSI assay in colorectal and endometrial cancer**

Iiris Ukkola<sup>1,2</sup>, Pirjo Nummela<sup>2</sup>, Annukka Pasanen<sup>1</sup>, Mia Kero<sup>1</sup>, Anna Lepistö<sup>2,3</sup>, Soili Kytölä<sup>4</sup>, Ralf Bützow<sup>1,2</sup> & Ari Ristimäki<sup>1,2</sup>

E-mail of corresponding author: ari.ristimaki (at) helsinki. Fi

<sup>1</sup>Department of Pathology, HUSLAB, HUS Diagnostic Center, Helsinki University Hospital and University of Helsinki, Helsinki, Finland

<sup>2</sup>Applied Tumor Genomics Research Program, Research Programs Unit, University of Helsinki, Helsinki, Finland

<sup>3</sup>Department of Gastrointestinal Surgery, Helsinki University Hospital, Helsinki, Finland

<sup>4</sup>Department of Genetics, HUSLAB, HUS Diagnostic Center, Helsinki University Hospital, Helsinki, Finland

**Supplementary Table S1** Characteristics of the performance of Idylla MSI test in respect of variable tumor cell percentage

| Case | Tumor cells (%) | Tissue area (mm <sup>2</sup> ) | Biomarker     |              |              |              |             |               |              | Number of mutated biomarkers | Idylla MSI analysis |
|------|-----------------|--------------------------------|---------------|--------------|--------------|--------------|-------------|---------------|--------------|------------------------------|---------------------|
|      |                 |                                | <i>ACVR2A</i> | <i>BTBD7</i> | <i>DIDO1</i> | <i>MRE11</i> | <i>RYR3</i> | <i>SEC31A</i> | <i>SULF2</i> |                              |                     |
| B04  | 15              | 150                            | -             | -            | -            | -            | -           | -             | -            | 0/7                          | MSS                 |
|      | 30              | 300                            | -             | -            | +            | +            | -           | -             | -            | 2/7                          | MSI                 |
|      | 60              | 50                             | -             | -            | +            | +            | -           | -             | -            | 2/7                          | MSI                 |
| B05  | 10              | 150                            | -             | -            | -            | -            | -           | -             | -            | 0/7                          | MSS                 |
|      | 30              | 140                            | -             | +            | -            | -            | -           | -             | +            | 2/7                          | MSI                 |
|      | 70              | 80                             | -             | +            | +            | +            | -           | +             | +            | 5/7                          | MSI                 |
| B09  | 15              | 300                            | -             | -            | -            | -            | -           | -             | -            | 0/7                          | MSS                 |
|      | 30              | 25                             | -             | +            | +            | +            | +           | +             | +            | 6/7                          | MSI                 |
| B10  | 15              | 270                            | -             | -            | -            | -            | -           | -             | -            | 0/7                          | MSS                 |
|      | 50              | 270                            | +             | +            | +            | +            | +           | -             | +            | 6/7                          | MSI                 |
| B35  | 15              | 150                            | -             | -            | -            | -            | -           | -             | -            | 0/7                          | MSI                 |
|      | 40              | 60                             | +             | -            | -            | +            | -           | -             | +            | 3/7                          | MSI                 |
| B37  | 15              | 300                            | -             | +            | +            | -            | +           | -             | -            | 3/7                          | MSI                 |
|      | 25              | 100                            | -             | -            | +            | -            | +           | -             | -            | 2/7                          | MSI                 |
|      | 60              | 25                             | -             | +            | +            | -            | +           | +             | +            | 5/7                          | MSI                 |
| B38  | 15              | 300                            | -             | -            | -            | -            | -           | -             | -            | 0/7                          | MSS                 |
|      | 25              | 150                            | -             | -            | -            | -            | -           | -             | -            | 0/7                          | MSS                 |
|      | 50              | 50                             | -             | -            | +            | +            | -           | -             | +            | 3/7                          | MSI                 |
| B54  | 15              | 300                            | -             | +            | +            | +            | +           | +             | +            | 6/7                          | MSI                 |
|      | 25              | 150                            | -             | +            | +            | +            | +           | +             | +            | 6/7                          | MSI                 |
|      | 60              | 55                             | -             | +            | +            | +            | +           | +             | +            | 6/7                          | MSI                 |

MSI, microsatellite instable; MSS, microsatellite stable

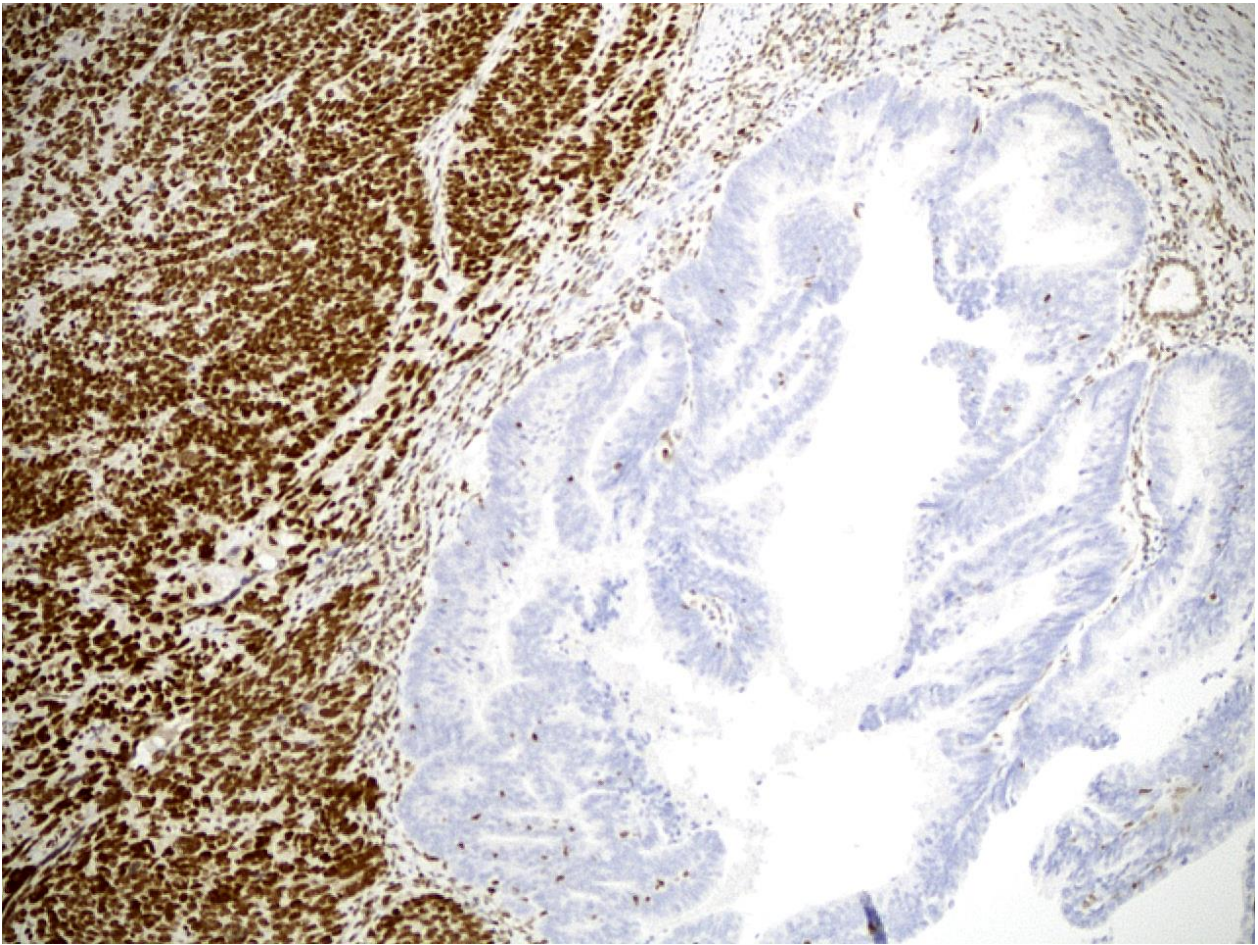

**Supplementary Fig. S1** Endometrial cancer with heterogeneous loss of MLH1 (case B107). On left is shown solid component with intact MLH1 expression, whereas on the right is glandular endometrioid component with loss of MLH1 expression in cancer cells and intact MLH1 expression in intraepithelial lymphocytes (a concomitant loss of PMS2 protein expression was also detected in cancer cells, whereas MSH2 and MSH6 protein expression was intact, not shown). Original magnification 200x, DAB was used as a chromogen.
